# Supplementary material for: Supplementation with Bifidobacterium animalis subsp. lactis MH-022 for remission of motor impairments in a 6-OHDA-induced Parkinson's disease rat model by reducing inflammation, reshaping the gut microbiome, and fostering specific microbial taxa
Source: Royal Society of Chemistry journal article supplement (doi:10.1039/d4fo02039a), 2024-01-01
Supplement: d4fo02039a1.xlsx [file d4fo02039a1.xlsx]

## Sheet: LAB correlation-S
	Bifidobacterium longum	Bifidobacterium adolescentis	Bifidobacterium animalis	Bifidobacterium bifidum	Lactobacillus reuteri	Lactobacillus intestinalis	Lactobacillus frumenti	Lactobacillus apis	Lactobacillus salivarius	Apomorphine test (rotation/min)	Survival ratio of TH+ neurons in the striatum	Survival ratio of TH+ neurons in the SNpc	CatWalk gait - Speed (cm/sec)	CatWalk gait - Stride length (cm)	CatWalk gait - Swing time (sec)	CatWalk gait - Stance Time (sec)	Rotarod - Time spent on rod (sec)	Grip strength (g)	Glutathione Peroxidase Activity (U)	Catalase activity (U/mL)	Total-Superoxide Dismutase (U/mL)	TNF-α (pg/mL)	IL-1β (pg/mL)	IL-6 (pg/mL)
N1	0.016	0.021	0.008	0.01	9.04	4.084	0.076	0.006	0.031	0	98.13	109.09	45.517	19.568	0.121	0.275	180	1761.33	2962.8	26.4875	1537.01	96.84	385.83	17.1
N2	0.018	0.016	0.006	0.008	2.912	0.639	0.016	0.001	0.092	0	99.02	98.77	43.334	19.293	0.119	0.225	180	1814.5	2835.4	29.575	1690.71	101.15	404.28	12.1
N4	0.016	0.026	0.005	0.016	8.961	4.358	0.078	0.006	0.069	0	99.44	105.06	49.825	18.2286	0.12	0.235	180	1869.4	2198.2	27.1375	1613.86	95.47	356.25	16.8
N5	0.037	0.052	0.017	0.005	4.68	0.913	0.016	0.001	0.079	0	98.13	109.09	52.926	17.367	0.119	0.212	180	1885.88	3111.5	24.9438	1729.13	96.13	381.92	13.8
N6	0.012	0.019	0.013	0.006	5.434	5.21	0.083	0.002	0.171	0	99.02	98.77	58.137	16.073	0.129	0.238	180	1811.3	2676.1	27.3	1882.83	94.88	377.48	11.4
N7	0.02	0.015	0.005	0.011	3.987	4.438	0.138	0.001	0.095	0	99.44	105.06	49.211	18.842	0.113	0.225	180	1744.7	2623	29.1688	1613.86	88.33	385.75	19.8
P1	0	0.005	0	0	1.334	0.926	0.031	0	0.001	15	6.18	3.37	21.517	6.574	0.181	0.674	61.8	982.14	1847.8	12.025	1152.76	271.75	666.67	41.1
P2	0	0	0.001	0	0.656	0.203	0.015	0	0	11	9.01	2.2	36.223	10.314	0.157	0.506	68.9	913.2	2591.2	12.35	1075.91	244.65	608.42	39.4
P3	0	0	0.001	0	0.631	0.067	0.005	0	0.032	12	6.94	3.61	29.2086	10.476	0.168	0.585	67	898.86	2368.1	8.04375	1191.18	252.38	613.33	40.8
P4	0	0.003	0.001	0.001	0.028	0.075	0.004	0.001	0.027	15	6.18	3.37	37.778	11.126	0.156	0.646	64.8	806.6	1306.2	14.8688	922.205	252.3	611.52	41.4
P5	0	0	0	0	0.176	0.146	0.005	0	0.028	12	9.01	2.2	20.556	16.133	0.175	0.575	75.5	952.43	1582.3	10.3188	960.63	228.95	580.96	40.8
P6	0	0.004	0	0	1.268	2.859	0.061	0.001	0.023	13	6.94	3.61	29.969	8.233	0.171	0.525	75.5	925.9	1667.3	7.39375	1114.33	264.25	588.23	49.4
LB1	0.004	0.009	0.003	0.001	7.89	2.417	0.076	0.003	0.003	10	35.23	22.92	26.321	11.212	0.15775	0.259	137.7	1408.23	3663.7	16.9813	1460.16	157.2	506.5	27.1
LB2	0	0.008	0.004	0.001	0.015	2.315	0.089	0.001	0.024	8	34.74	24	28.031	13.785	0.134	0.25	137.8	1508.3	2453.1	13.8938	1729.13	161.5	482.36	30.1
LB3	0.009	0.009	0.002	0	5.873	1.291	0.038	0.003	0.064	10	34.87	19.61	33.8154	14.6852	0.143	0.306	149.8	1591.83	2824.8	14.8688	1460.16	150.33	551.5	29.1
LB4	0.013	0.007	0.002	0.002	1.462	1.706	0.04	0	0.046	11	35.23	22.92	37.863	16.675	0.1355	0.281	139	1517.62	2676.1	15.7625	1767.56	148.5	515.35	28.1
LB5	0	0.008	0.003	0.001	3.571	2.243	0.062	0.001	0.027	9	34.74	24	38.511	18.089	0.145	0.269	136.8	1464.72	2421.2	19.9063	1383.31	162.45	486.12	31.1
LB6	0.003	0.013	0.015	0	9.599	2.828	0.084	0.001	0.019	10	34.87	19.61	38.351	13.665	0.1405	0.471	125.5	1559.32	2633.6	17.3063	1498.58	122	550.27	29.1
HB1	0.013	0.016	0.004	0.002	2.965	2.643	0.063	0.002	0.038	8	44.21	56.18	42.457	13.605	0.125	0.231	149	1828.08	3037.2	25.5125	1805.98	123.1	453.25	24.4
HB2	0.008	0.009	0.002	0.007	2.743	4.462	0.092	0	0.048	9	43.62	57.8	36.886	15.243	0.108	0.272	147.4	1755.6	2580.5	22.9938	1767.56	119.3	446.48	23.8
HB3	0.009	0.008	0.006	0.001	2.393	2.138	0.06	0.001	0.055	8	46.05	55.7	42.3868	16.7832	0.122	0.259	154.2	1793.67	3026.5	20.5563	1613.86	119.9	446.5	26.1
HB4	0.005	0.009	0.016	0.001	4.605	0.231	0.011	0.002	0.068	10	44.21	56.18	45.907	18.046	0.122	0.244	147.9	1701.3	3366.4	24.7	1690.71	124.54	455.95	25.1
HB5	0.011	0.024	0.005	0.002	12.095	4.193	0.176	0.004	0.043	9	43.62	57.8	53.617	18.24	0.106	0.25	139.8	1803.22	2877.9	21.9375	1729.13	102.45	430.25	25.4
HB6	0.015	0.008	0.002	0.005	14.062	6.387	0.144	0.006	0.052	9	46.05	55.7	33.067	18.782	0.147	0.3	146	1651.65	3270.8	23.8063	1498.58	130.1	503.28	25

## Sheet: genus level
	Lactobacillus	Bacteroides	Oscillospira	Sediminibacterium	Ruminococcus	Burkholderia	Coprococcus	Megamonas	Alistipes	Clostridium	Apomorphine test (rotation/min)	Survival ratio of TH+ neurons in the striatum	Survival ratio of TH+ neurons in the SNpc	CatWalk gait - Speed (cm/sec)	CatWalk gait - Stride length (cm)	CatWalk gait - Swing time (sec)	CatWalk gait - Stance Time (sec)	Rotarod - Time spent on rod (sec)	Grip strength (g)	Glutathione Peroxidase Activity (U)	Catalase activity (U/mL)	Total-Superoxide Dismutase (U/mL)	TNF-α (pg/mL)	IL-1β (pg/mL)	IL-6 (pg/mL)
N1	42.6884	28.0379	8.85282	2.24719	6.83049	5.35494	5.5775	1.01347	1.24719	0.852816	0	98.13	109.09	45.517	19.568	0.121	0.275	180	1761.33	2962.8	26.4875	1537.01	96.84	385.83	17.1
N2	56.0534	23.3833	8.34428	1.56768	4.65215	4.91779	8.60054	1.93393	0	0	0	99.02	98.77	43.334	19.293	0.119	0.225	180	1814.5	2835.4	29.575	1690.71	101.15	404.28	12.1
N4	26.4232	14.0768	6.49468	1.84483	6.87432	6.3526	5.67749	0.942687	0	0.0494677	0	99.44	105.06	49.825	18.2286	0.12	0.235	180	1869.4	2198.2	27.1375	1613.86	95.47	356.25	16.8
N5	34.7097	18.0343	7.24287	2.99124	4.71772	4.69799	8.27266	2.7966	0	0.0242866	0	98.13	109.09	52.926	17.367	0.119	0.212	180	1885.88	3111.5	24.9438	1729.13	96.13	381.92	13.8
N6	41.032	22.8457	6.214	2.03948	7.08248	4.119	5.63297	0.071508	1.03948	0.214	0	99.02	98.77	58.137	16.073	0.129	0.238	180	1811.3	2676.1	27.3	1882.83	94.88	377.48	11.4
N7	40.0046	30.7875	6.76048	2.96702	6.5045	6.37703	7.64724	1.27219	0	0	0	99.44	105.06	49.211	18.842	0.113	0.225	180	1744.7	2623	29.1688	1613.86	88.33	385.75	19.8
P1	31.5231	6.08368	6.01387	12.1791	20.1734	8.37178	4.65352	3.38545	0	0	15	6.18	3.37	21.517	6.574	0.181	0.674	61.8	982.14	1847.8	12.025	1152.76	271.75	666.67	41.1
P2	17.848	8.67785	4.15932	9.68456	10.715	9.67528	4.42066	4.18303	0.684564	0.59318	11	9.01	2.2	36.223	10.314	0.157	0.506	68.9	913.2	2591.2	12.35	1075.91	244.65	608.42	39.4
P3	25.1154	10.9649	4.41114	7.66242	27.2807	7.17728	4.09918	3.58967	0	0.411139	12	6.94	3.61	29.2086	10.476	0.168	0.585	67	898.86	2368.1	8.04375	1191.18	252.38	613.33	40.8
P4	15.3304	11.8589	8.73389	10.611	17.5715	10.4125	5.56276	2.61075	0	0	15	6.18	3.37	37.778	11.126	0.156	0.646	64.8	806.6	1306.2	14.8688	922.205	252.3	611.52	41.4
P5	19.0348	10.7752	7.5166	13.3552	24.1281	7.28936	5.01994	0	0.3552	0	12	9.01	2.2	20.556	16.133	0.175	0.575	75.5	952.43	1582.3	10.3188	960.63	228.95	580.96	40.8
P6	25.088	8.14782	3.70493	9.96146	23.2294	8.52717	4.57102	4.7501	0	0.270493	13	6.94	3.61	29.969	8.233	0.171	0.525	75.5	925.9	1667.3	7.39375	1114.33	264.25	588.23	49.4
LB1	40.8179	10.2787	9.7881	3.0329	20.5562	2.48856	11.0249	2.10107	0	0	10	35.23	22.92	26.321	11.212	0.15775	0.259	137.7	1408.23	3663.7	16.9813	1460.16	157.2	506.5	27.1
LB2	26.6583	8.12172	11.745	3.08236	17.4506	2.76211	6.90634	2.38526	0.1361	0.54497	8	34.74	24	28.031	13.785	0.134	0.25	137.8	1508.3	2453.1	13.8938	1729.13	161.5	482.36	30.1
LB3	34.9655	13.1905	9.55573	1.26656	33.5334	3.69452	6.56662	0	0.6655	0	10	34.87	19.61	33.8154	14.6852	0.143	0.306	149.8	1591.83	2824.8	14.8688	1460.16	150.33	551.5	29.1
LB4	24.944	12.4232	10.4482	2.78149	30.3752	2.79202	11.438	3.43549	0	0	11	35.23	22.92	37.863	16.675	0.1355	0.281	139	1517.62	2676.1	15.7625	1767.56	148.5	515.35	28.1
LB5	43.0905	7.96724	5.8412	1.15095	18.7419	3.58477	6.5775	3.70828	0	0.741198	9	34.74	24	38.511	18.089	0.145	0.269	136.8	1464.72	2421.2	19.9063	1383.31	162.45	486.12	31.1
LB6	33.3904	8.2578	5.87988	1.55086	23.4253	2.5579	9.1996	1.84592	0	0.879875	10	34.87	19.61	38.351	13.665	0.1405	0.471	125.5	1559.32	2633.6	17.3063	1498.58	122	550.27	29.1
HB1	45.1479	20.2646	9.82347	0.715023	20.4791	2.3506	6.9333	1.63558	0	0	8	44.21	56.18	42.457	13.605	0.125	0.231	149	1828.08	3037.2	25.5125	1805.98	123.1	453.25	24.4
HB2	35.2349	12.6776	8.80266	0.571584	13.7032	2.36428	10.6704	1.58682	0	2.80266	9	43.62	57.8	36.886	15.243	0.108	0.272	147.4	1755.6	2580.5	22.9938	1767.56	119.3	446.48	23.8
HB3	45.889	14.9509	9.46875	0.60153	26.1835	2.28656	6.02801	0	0.060153	0	8	46.05	55.7	42.3868	16.7832	0.122	0.259	154.2	1793.67	3026.5	20.5563	1613.86	119.9	446.5	26.1
HB4	32.5971	20.8338	7.28156	0.615639	8.65532	1.71194	9.67706	2.04306	0	1.28156	10	44.21	56.18	45.907	18.046	0.122	0.244	147.9	1701.3	3366.4	24.7	1690.71	124.54	455.95	25.1
HB5	33.8849	17.2653	8.92466	0.85705	11.4094	2.30497	9.15919	1.1645	0	0	9	43.62	57.8	53.617	18.24	0.106	0.25	139.8	1803.22	2877.9	21.9375	1729.13	102.45	430.25	25.4
HB6	34.6123	18.3333	8.40007	1.43357	19.4182	3.3788	5.95036	0.258376	0.433572	2.40007	9	46.05	55.7	33.067	18.782	0.147	0.3	146	1651.65	3270.8	23.8063	1498.58	130.1	503.28	25
