# Supplementary material for: Supplementation with Bifidobacterium animalis subsp. lactis MH-022 for remission of motor impairments in a 6-OHDA-induced Parkinson's disease rat model by reducing inflammation, reshaping the gut microbiome, and fostering specific microbial taxa
Source: Royal Society of Chemistry journal article supplement (doi:10.1039/d4fo02039a), 2024-01-01
Supplement: d4fo02039a2.pdf [file d4fo02039a2.pdf]

### Supplementary Materials

**Table S1.** Primer sequences for rat antioxidant, inflammation, neurotransmitter, mitochondrial, and tight junction mRNA

| Gene                           | Forward                    | Reverse                      | Accession Number |
|--------------------------------|----------------------------|------------------------------|------------------|
| <i>Bdnf</i>                    | 5'- ACTCGCAATGCCGAACTACC   | 5'- CCTTATGAACCGCCAGCCAAT    | NM_001270638.1   |
| <i>Gdnf</i>                    | 5'- TCACCAGATAAACAAGCGC    | 5'- TTTCATAGCCCAAACCCAA      | NM_001301357     |
| <i>Sod1</i>                    | 5'- TTCGTTTCTGCGGCGGCTTCT  | 5'- GGTTACCGCTTGCCTTCTGCT    | NM_017050.1      |
| <i>Sod2</i>                    | 5'- CAATCTGAACGTCACCGAGGA  | 5'- AGCAGGCGGCAATCTGTAA      | NM_017051.2      |
| <i>Gpx</i>                     | 5'- CTCTCCGCGGTGGCACAGT    | 5'- CCACCACGGGTCCGACATAC     | NM_030826.4      |
| <i>Cat</i>                     | 5'- TGTGGTTTTTCACCGACGAGAT | 5'- GCTTGAAGGTGTGTGAGCCAT    | NM_012520.2      |
| <i>Tnf-<math>\alpha</math></i> | 5'-GGGGCCACCACGCTCTTCTGTC  | 5'- TGGGCTACGGGCTTGTCACTCG   | NM_012675.3      |
| <i>Il-1b</i>                   | 5'- CCAGGATGAGGACCCAAGCA   | 5'- TCCCACCATTGCTGTTTCC      | NM_031512.2      |
| <i>Il-6</i>                    | 5'- TTGACAGCCACTGCCTTCCC   | 5'- CGGAACTCCAGAAGACCAGAGC   | NM_012589.2      |
| <i>Il-10</i>                   | 5'- AGGGTTACTTGGGTTGCC     | 5'- GGGTCTTCAGTTCTCTCC       | NM_012854.2      |
| <i>Nd1</i>                     | 5'- CAAAGGCCCAACAACGAAG    | 5'- TGAGGTGGTTAGAGGGCGTA     | X07479.1         |
| <i>Atp6</i>                    | 5'- CGAACCTGAGCCCTAATA     | 5'- GTAGCTCCTCCGATTAGA       | MW209726.1       |
| <i>Sirt1</i>                   | 5'- CGCCTTATCCTCTAGTTCCTGT | 5'- GTCAGCATCATCTTCCAAGCC    | NM_001372090.1   |
| <i>Tfam</i>                    | 5'- CGCCTAAAGAAGAAAGCACA   | 5'- GCCCAACTTCAGCCATTT       | NM_031326.2      |
| <i>Pgc1a</i>                   | 5'- GTGCAGCCAAGACTCTGTATGG | 5'- GTCCAGGTCATTACATCAAGTTC  | NM_031347.1      |
| <i>Nrf1</i>                    | 5'- GCTGTCCCACTCGTGTCTGAT  | 5'- GTTTGAGTCTAACCCATCTATCCG | NM_001100708.1   |
| <i>Zo-1</i>                    | 5'- CCACCTCGCACGTATCACAAGC | 5'- GGCAATGACACTCCTTCGTCTCTG | NM_001106266.1   |
| <i>Ocln</i>                    | 5'- CCTCCTTACAGGCCGGATGA   | 5'- AGCATTGGTTCGAACGTGCAT    | NM_031329.3      |
